# Supplementary material
Source: publisher site journal article supplement (https://www.spandidos-publications.com/7475/downloadSupplementary)
Supplement: Supplementary file 1 [file downloadSupplementary]

## Sheet: IC50_CTRP
Table SXVI. The estimated IC50 value of the chemotherapy agents by analyzing data from the CTRP dataset.
	TCGA-VQ-A91X-01	TCGA-VQ-A8P2-01	TCGA-CG-4466-01	TCGA-CG-4436-01	TCGA-IN-A6RI-01	TCGA-HU-A4GD-01	TCGA-VQ-A91Z-01	TCGA-BR-8676-01	TCGA-HU-A4H0-01	TCGA-R5-A7ZR-01	TCGA-D7-8573-01	TCGA-VQ-AA69-01	TCGA-R5-A7ZI-01	TCGA-BR-8680-01	TCGA-CG-4443-01	TCGA-VQ-A91U-01	TCGA-HU-A4GH-01	TCGA-VQ-A8PO-01	TCGA-IN-A6RO-01	TCGA-CG-5726-01	TCGA-D7-6822-01	TCGA-VQ-A8PJ-01	TCGA-VQ-A8DT-01	TCGA-HU-A4GX-01	TCGA-D7-6528-01	TCGA-RD-A8N2-01	TCGA-BR-4280-01	TCGA-CD-8531-01	TCGA-HU-A4H8-01	TCGA-HU-A4G9-01	TCGA-BR-A4PF-01	TCGA-MX-A666-01	TCGA-CD-8535-01	TCGA-BR-A4QL-01	TCGA-VQ-A8PH-01	TCGA-KB-A93H-01	TCGA-HU-8249-01	TCGA-CD-A4MG-01	TCGA-VQ-A8PB-01	TCGA-IN-A6RJ-01	TCGA-CD-8528-01	TCGA-HU-A4H2-01	TCGA-R5-A7ZE-01	TCGA-HU-A4GT-01	TCGA-VQ-A91N-01	TCGA-BR-8486-01	TCGA-RD-A7C1-01	TCGA-HU-A4GP-01	TCGA-BR-8373-01
5-Fluorouracil	450742	446258	652307	564895	679970	586456	478948	478720	375362	553044	430019	539321	462351	643415	618453	602403	629063	312539	617949	363793	575624	549740	481358	457861	727408	1.14104e+06	344308	500657	435536	351898	626166	625114	768244	389758	533769	647571	736552	564456	503299	244245	440003	703227	378610	336125	588066	661250	629143	518681	892162
Paclitaxel	1877.36	389.247	1165.38	1853.53	1591.71	1683.42	794.365	313.337	907.509	2380.2	1680.77	288.824	696.54	688.075	5566.95	950.079	656.233	268.865	1316.98	494.797	601.64	1266.58	1062.97	732.856	1093.65	4265.54	838.011	121.602	392.765	475.691	1510.59	956.981	1861.96	488.295	999.772	1281.42	2774.28	874.018	473.434	332.745	304.924	843.393	663.505	480.187	771.484	1909.95	900.742	897.838	1653.89
Oxaliplatin	924519	1.15818e+06	1.09035e+06	1.28112e+06	1.64991e+06	1.29174e+06	1.29275e+06	1.23727e+06	1.31266e+06	1.24121e+06	1.2578e+06	1.1456e+06	1.343e+06	1.30147e+06	1.52364e+06	996394	1.61871e+06	1.04168e+06	1.29507e+06	1.18959e+06	1.34408e+06	1.31189e+06	1.26469e+06	1.27702e+06	1.3474e+06	1.25906e+06	954727	626049	1.23455e+06	1.07105e+06	1.0513e+06	1.07434e+06	1.18839e+06	1.10958e+06	1.04187e+06	1.30603e+06	1.22971e+06	1.26989e+06	1.16638e+06	1.73453e+06	1.13218e+06	1.32672e+06	1.56455e+06	1.03338e+06	1.11397e+06	1.14112e+06	1.41402e+06	1.17637e+06	1.17344e+06
Docetaxel	565.403	451.506	444.801	671.981	599.558	170.404	632.266	207.32	388.468	795.222	779.09	154.043	490.234	538.225	832.976	330.426	512.231	196.494	406.138	475.393	0.000112279	777.673	680.941	461.202	446.775	1323.14	279.651	61.7961	261.448	584.797	550.641	211.383	702.156	350.554	423.367	433.028	313.996	486.165	352.623	251.69	227.048	526.102	0.293287	397.892	575.581	339.348	432.663	550.884	834.768
[truncated: 326 more columns]
